# Supplementary material for: DNA cleavage behavior of a new p-xylyl spaced bisCu(BPA)Cl2 complex: the steric effect of a bulky p-xylyl-derived spacer
Source: Royal Society of Chemistry journal article supplement (doi:10.1039/c1nj20793h), 2011-12-08
Supplement: c1nj20793h.pdf [file c1nj20793h.pdf]

## DNA cleavage behavior of a new *p*-xylyl spaced bisCu(BPA)Cl<sub>2</sub> complex: the steric effect of bulky *p*-xylyl-derived spacer

Zhijun Xie, Zhen Yu, Yuncong Chen, Guoyuan Lu, Zijian Guo, Weijiang He\*

State Key Laboratory of Coordination Chemistry, Coordination Chemistry Institute, School of Chemistry and Chemical Engineering, Nanjing University, Nanjing 210093, P. R. China

Email: [hewej69@nju.edu.cn](mailto:hewej69@nju.edu.cn)

Tel: +86 25-83597066, Fax: +86 25-83314502

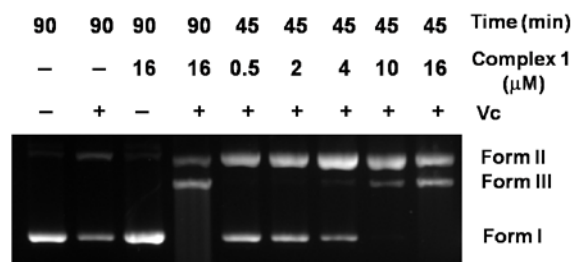

**Figure S1.** Agarose gel electrophoresis patterns of plasmid pUC19 DNA (0.02 mgmL<sup>-1</sup>, 30 μM base pair) obtained after at different incubation time when incubated with complex 1 of different concentration in Tris-HCl buffer (50 mM, pH 7.4) at 37 °C in the presence of 100-fold excess of ascorbic acid.

### Structural optimization of complex 1

The structure of complex 1 was optimized by density functional theory (DFT) calculations with 6-31G\* basis sets using a suite of Gaussian 03 programs.<sup>i</sup> Different initial structures of complex 1 were constructed based on the crystal structural data of complex Cu<sub>2</sub>(*p*TPXA)Cl<sub>4</sub>. Two stable conformations, *anti*-form and *cis*-form, were obtained (Figure S2). The Cu-Cu distance in *cis*-form (11.84 Å) is remarkably larger than the Cu-Cu distance in Cu<sub>2</sub>(*p*TPXA)Cl<sub>4</sub> (7.98 Å),<sup>ii</sup> whose dicopper centers display the internuclear synergic effect in activating O<sub>2</sub> to form ROS, and the two copper centers in *cis*-form are disable to react with the same O<sub>2</sub> molecule in a synergic manner. As to the *anti*-form, the two copper centers located above and below the benzoxadiazole plane respectively, can't react with the same O<sub>2</sub> molecules either, although the Cu-Cu distance is only 8.53 Å. Therefore, the two Cu(BPA)Cl<sub>2</sub> motifs in complex 1 may function solely as a mononuclear copper complex.

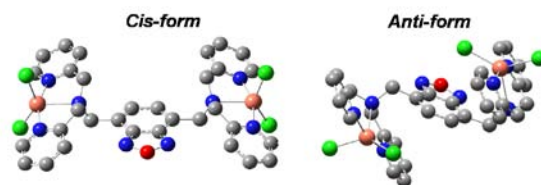

**Figure S2.** *Cis*- and *anti*-form of complex 1 obtained by theoretical study.

<sup>i</sup> M. J. Frisch, G. W. Trucks, H. B. Schlegel, *et al.*, GAUSSIAN 03 (Revision D.02), Gaussian Inc., Pittsburg, PA, 2006.

<sup>ii</sup> Y. Zhao, J. Zhu, W. He, Z. Yang, Y. Zhu, Y. Li, J. Zhang, Z. Guo, *Chem. Eur. J.* **2006**, *12*, 6621-6629.
